# Supplementary material
Source: PubMed Central journal article supplement (PMC3883927)
Supplement: NIHMS496565-supplement-Data__Info__Materials.pdf [file NIHMS496565-supplement-Data__Info__Materials.pdf]

**Figure S1**

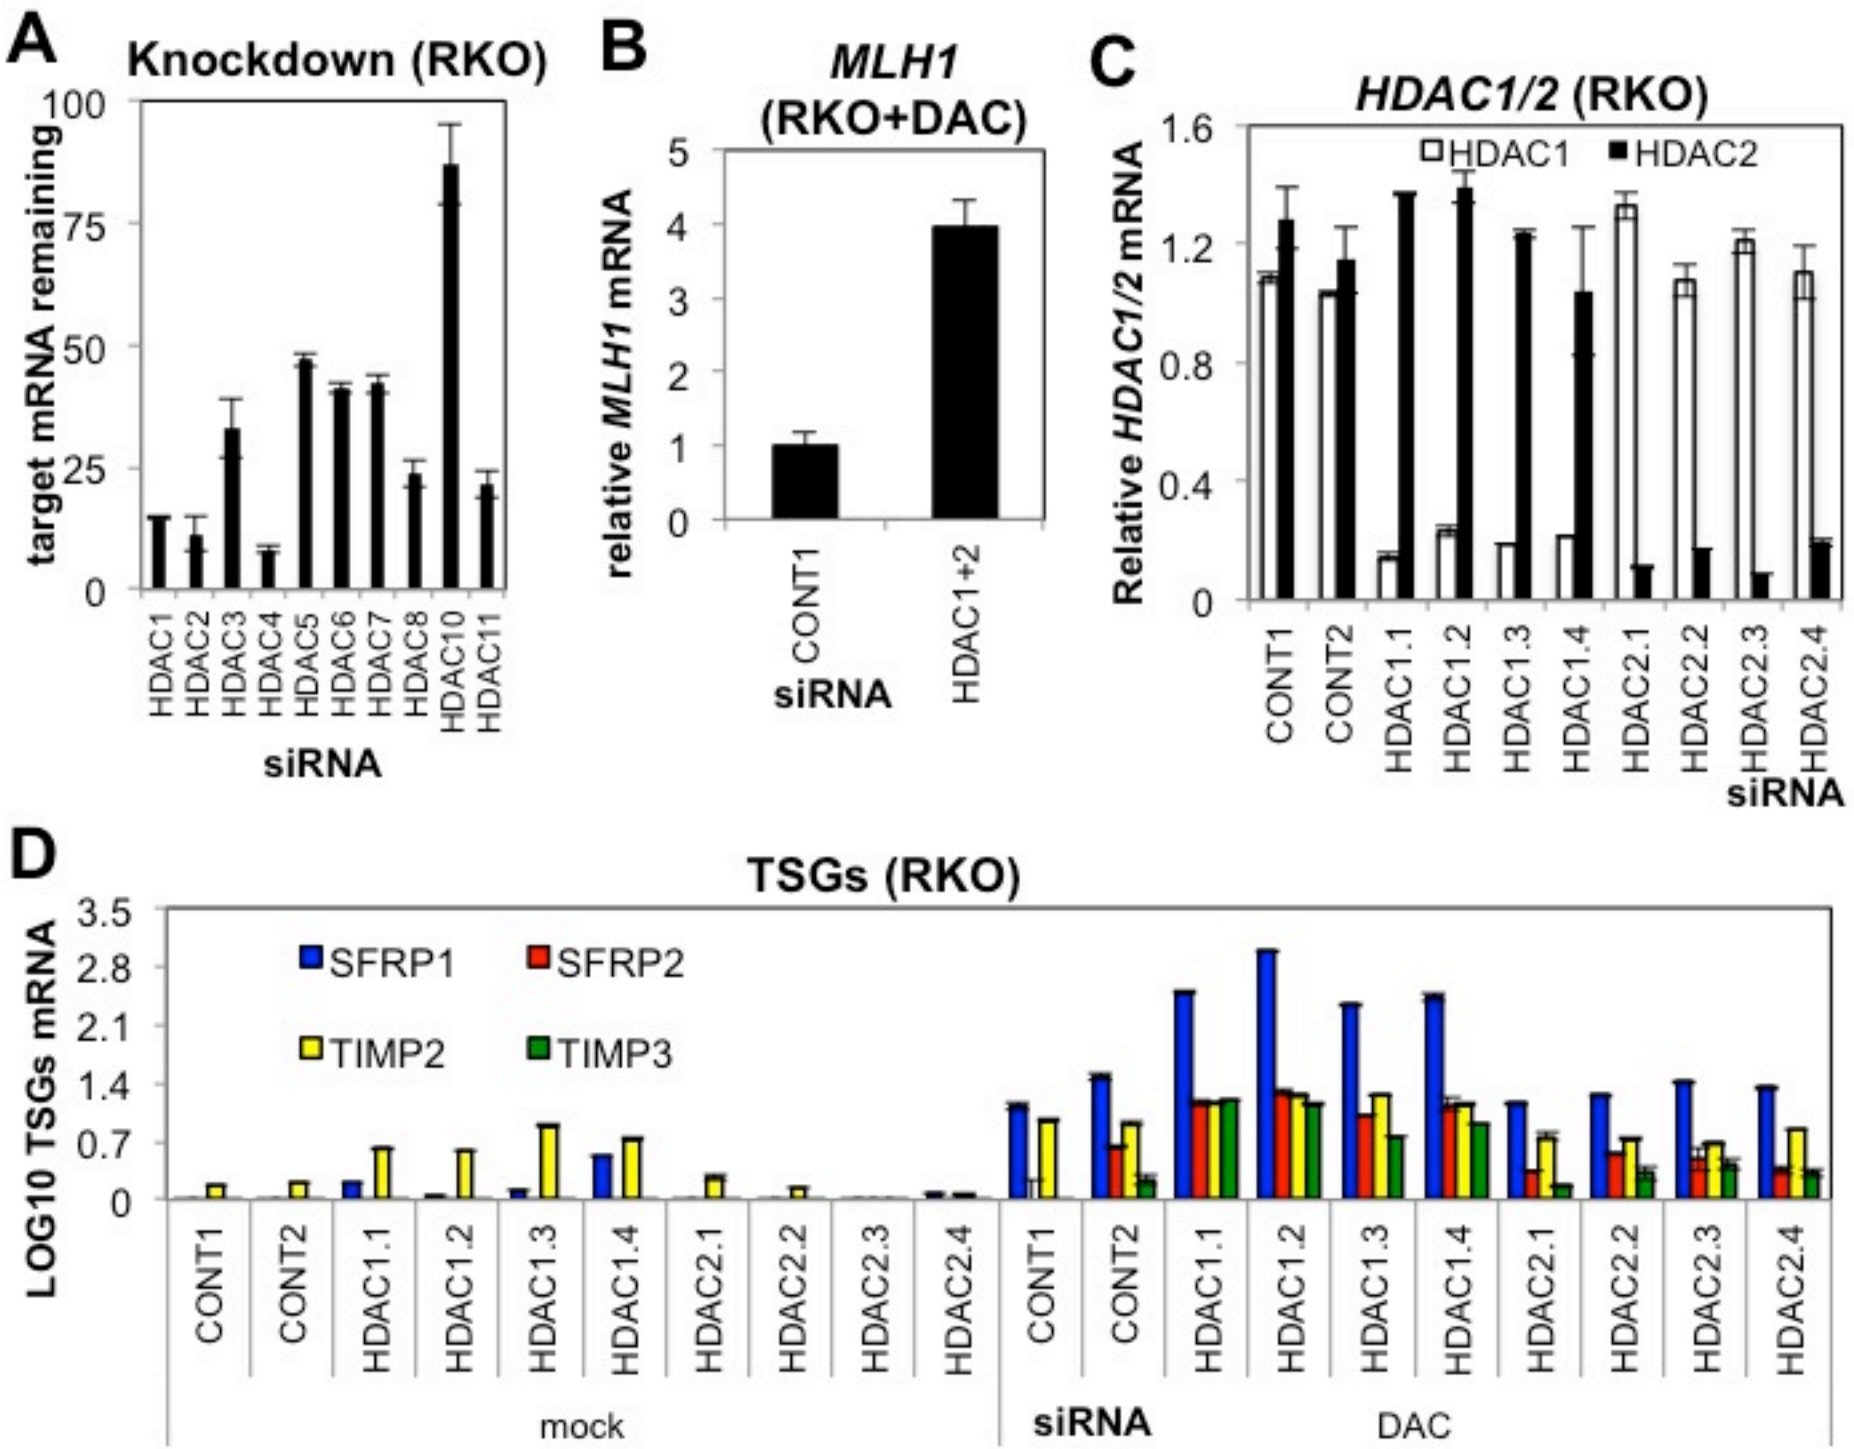

# Figure S2

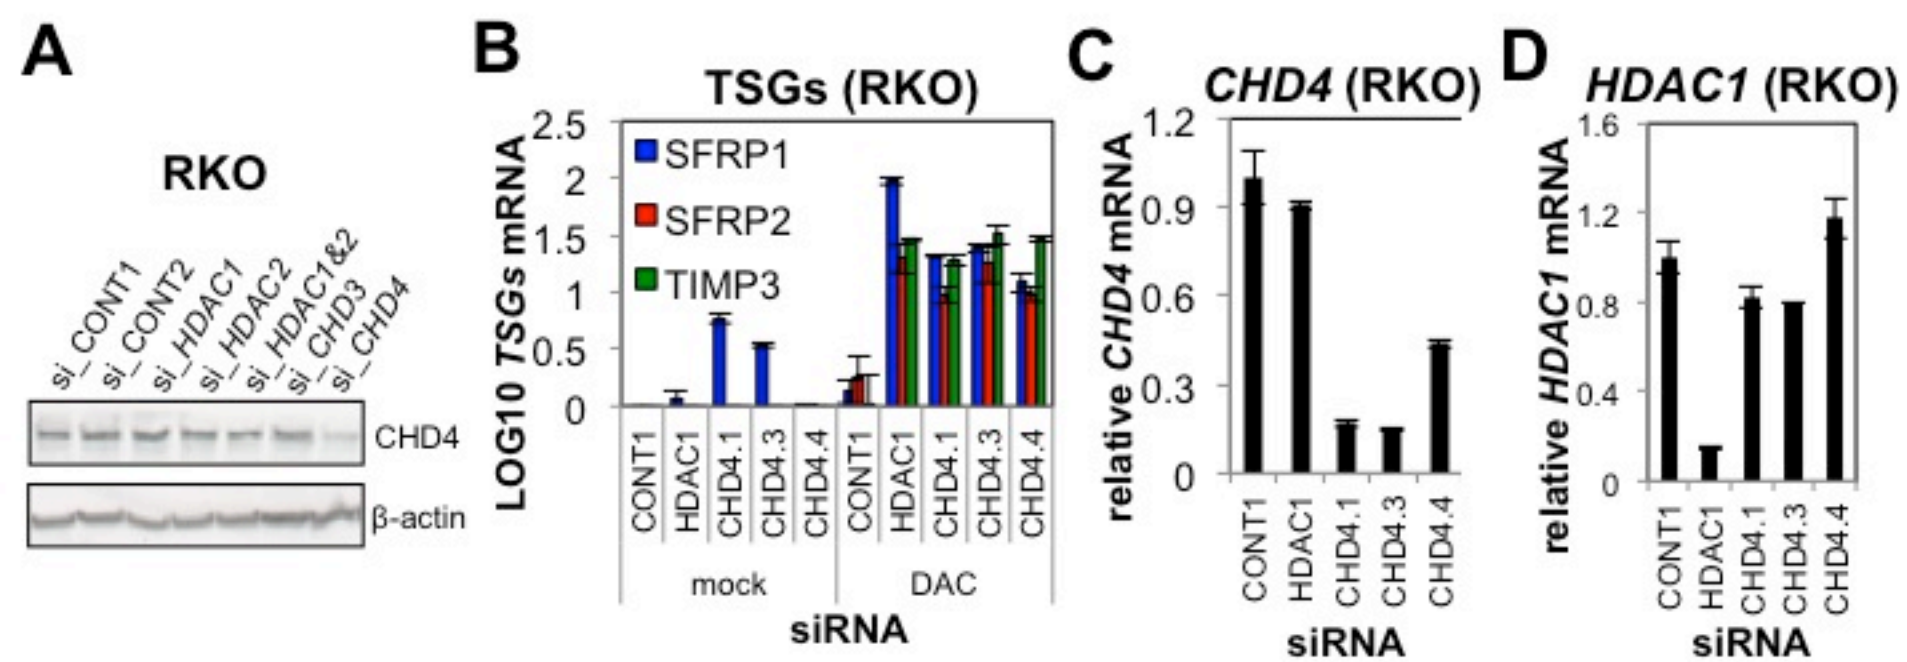

# Figure S3

## A

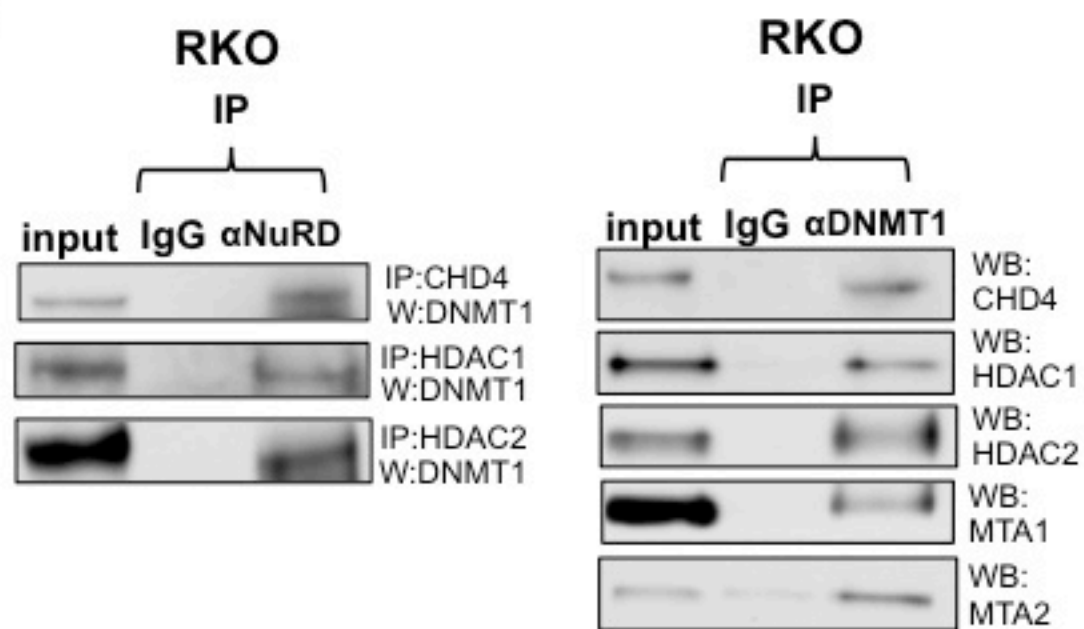

Figure S4

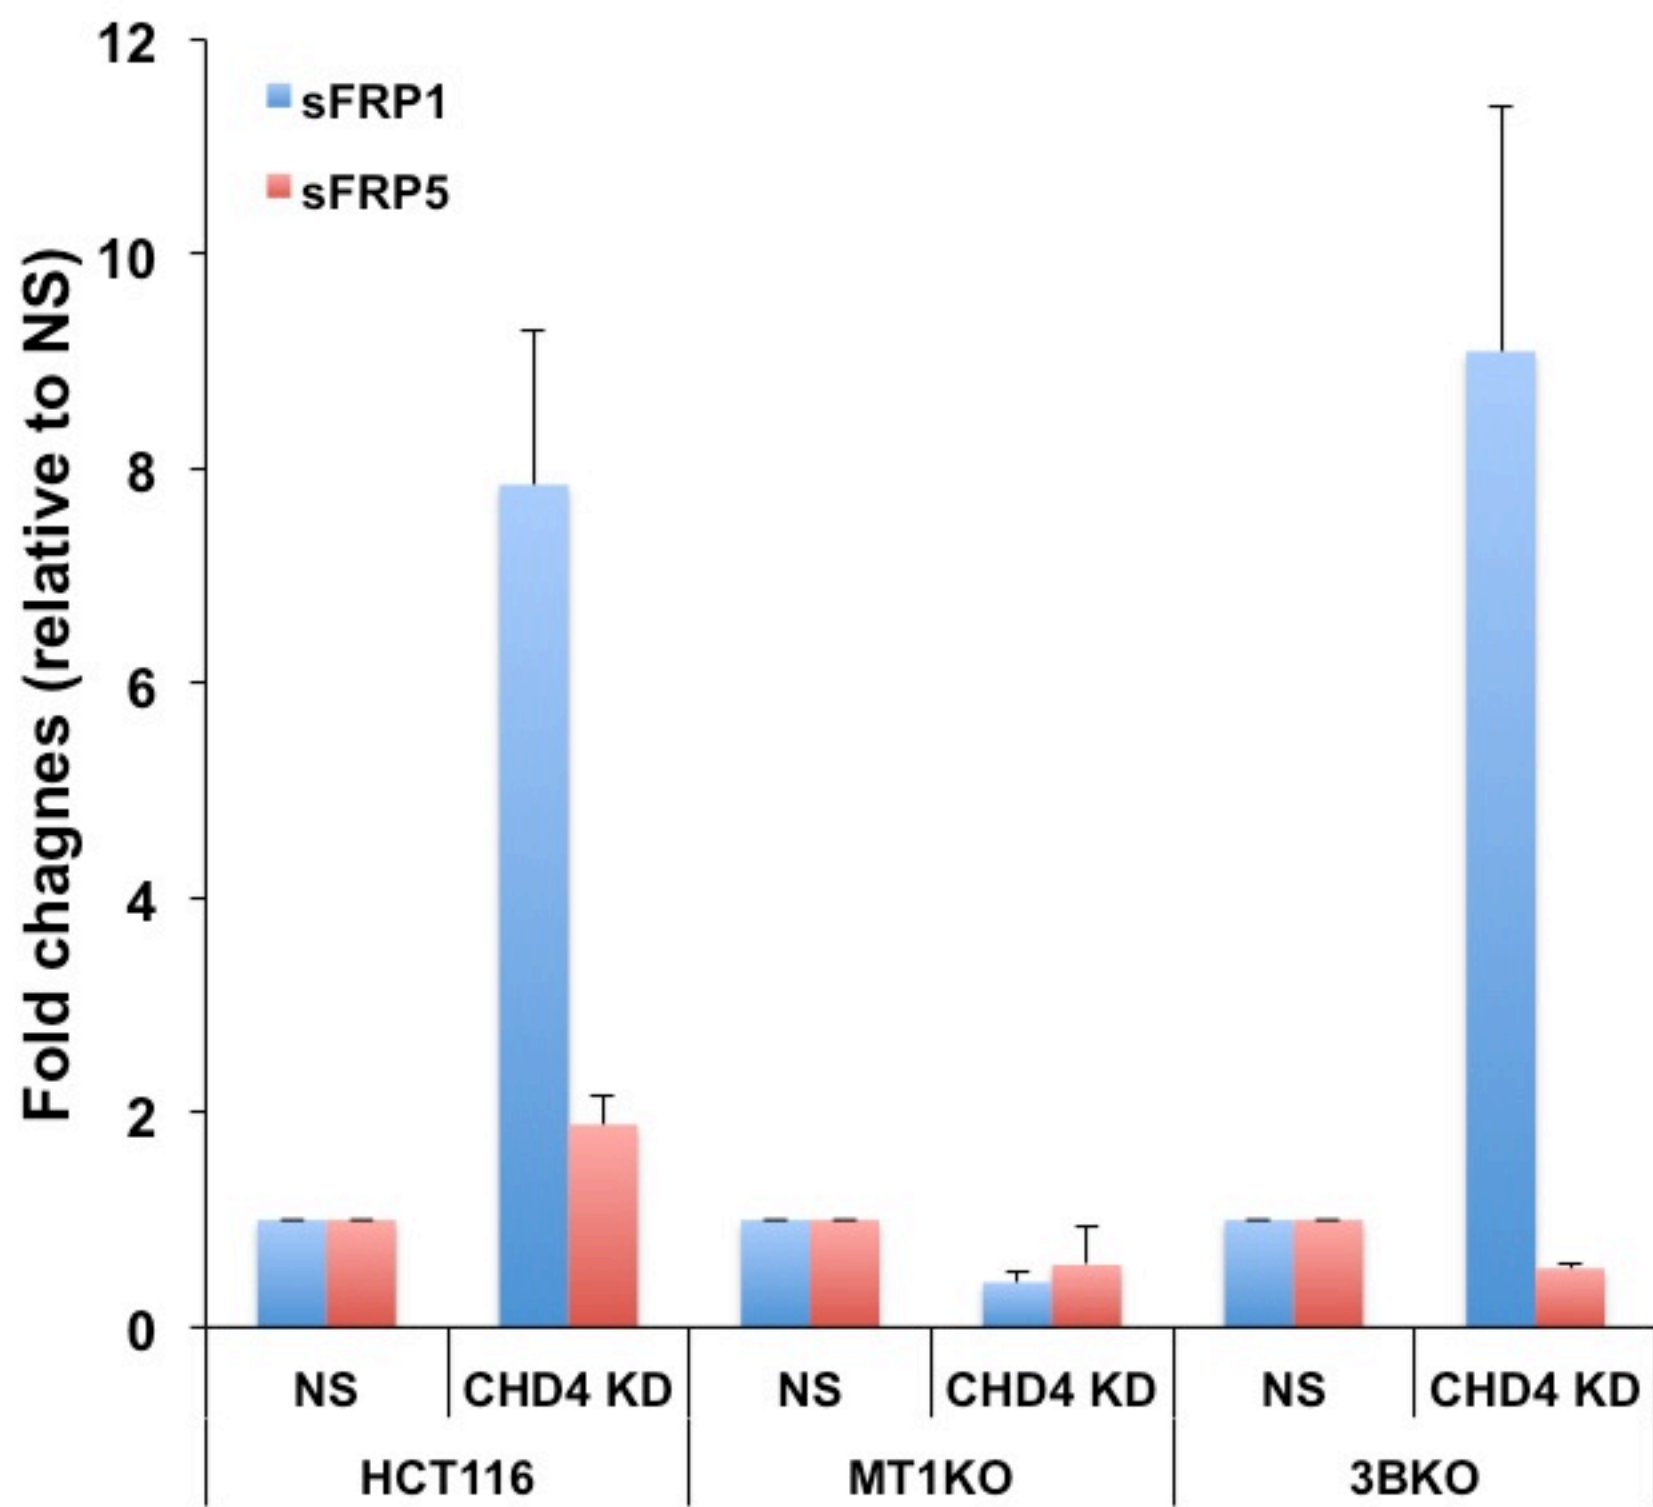

**FIGURE S5****A****HCT116**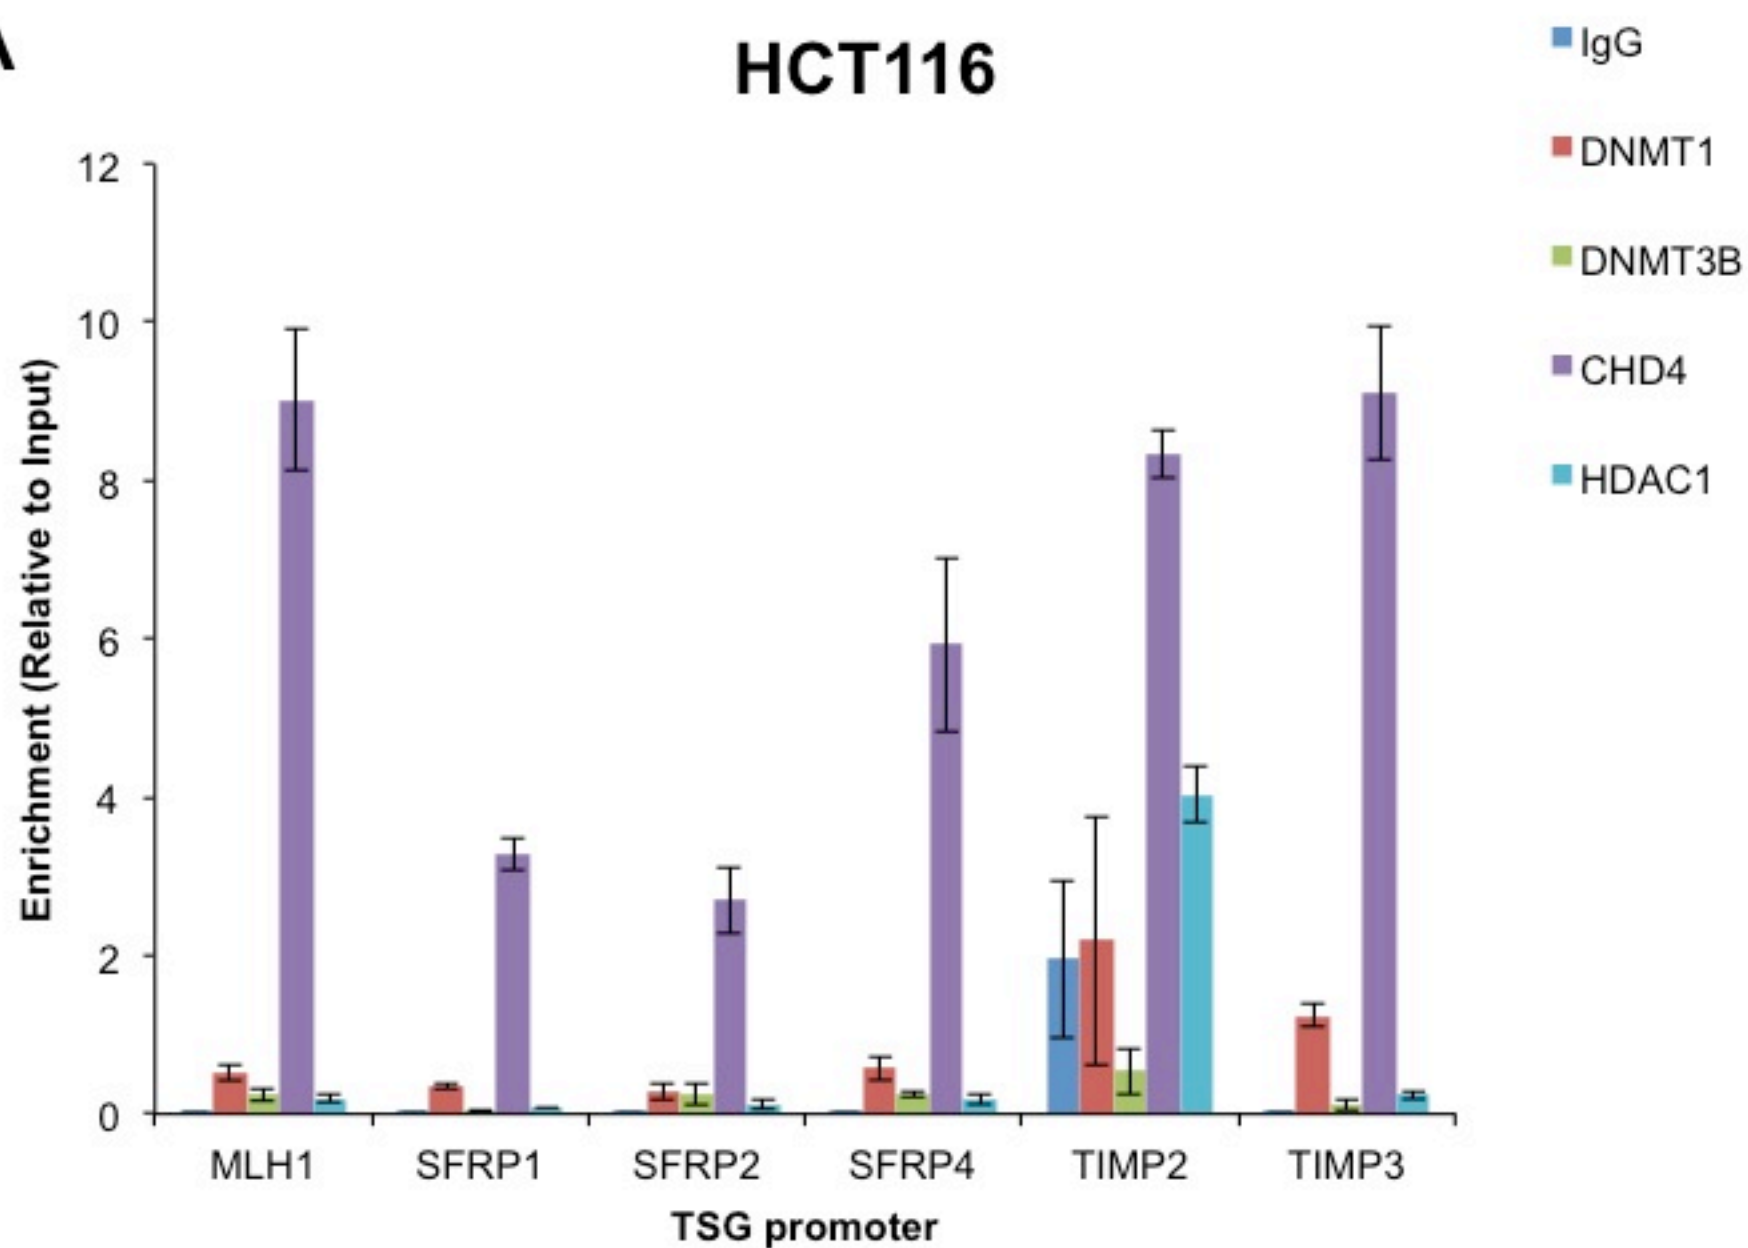**B****RKO**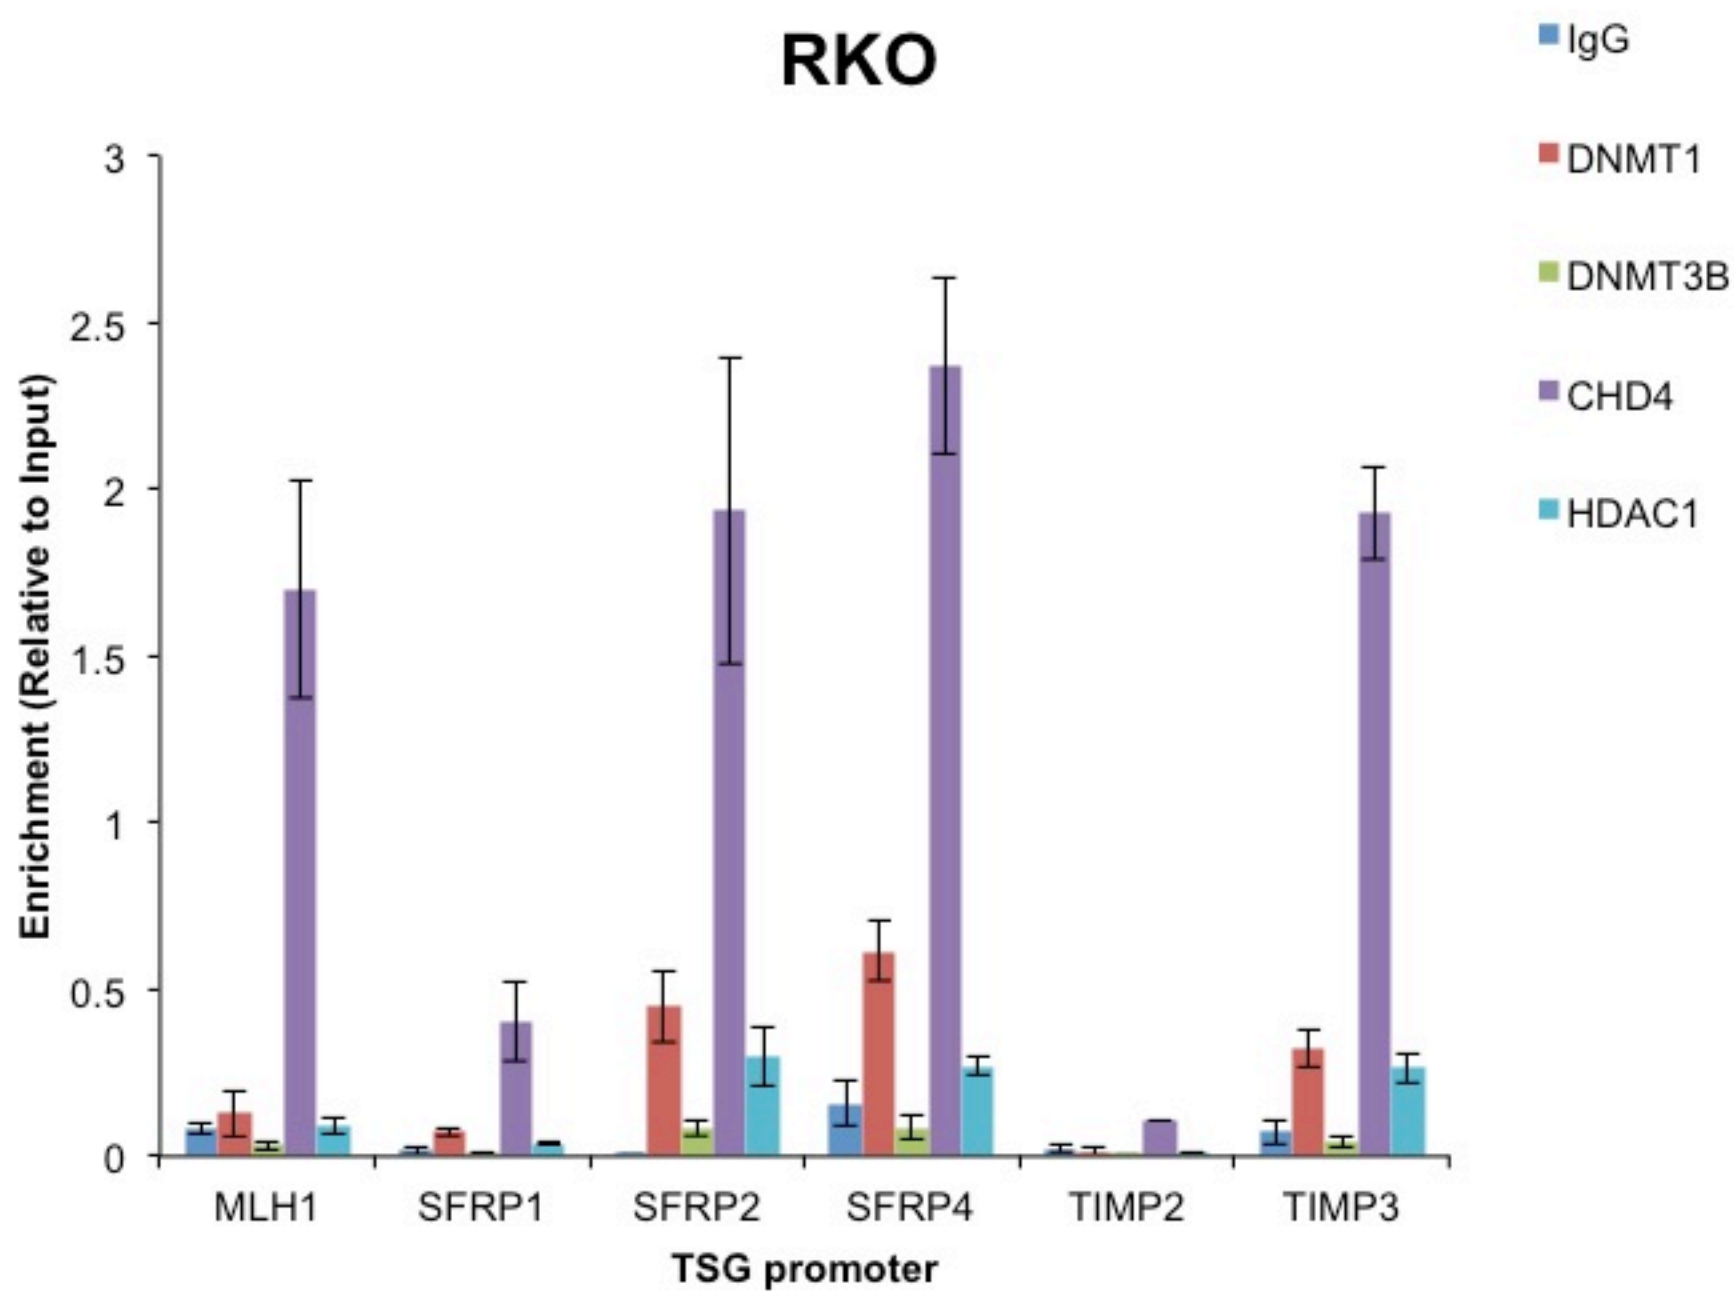

**FIGURE S6**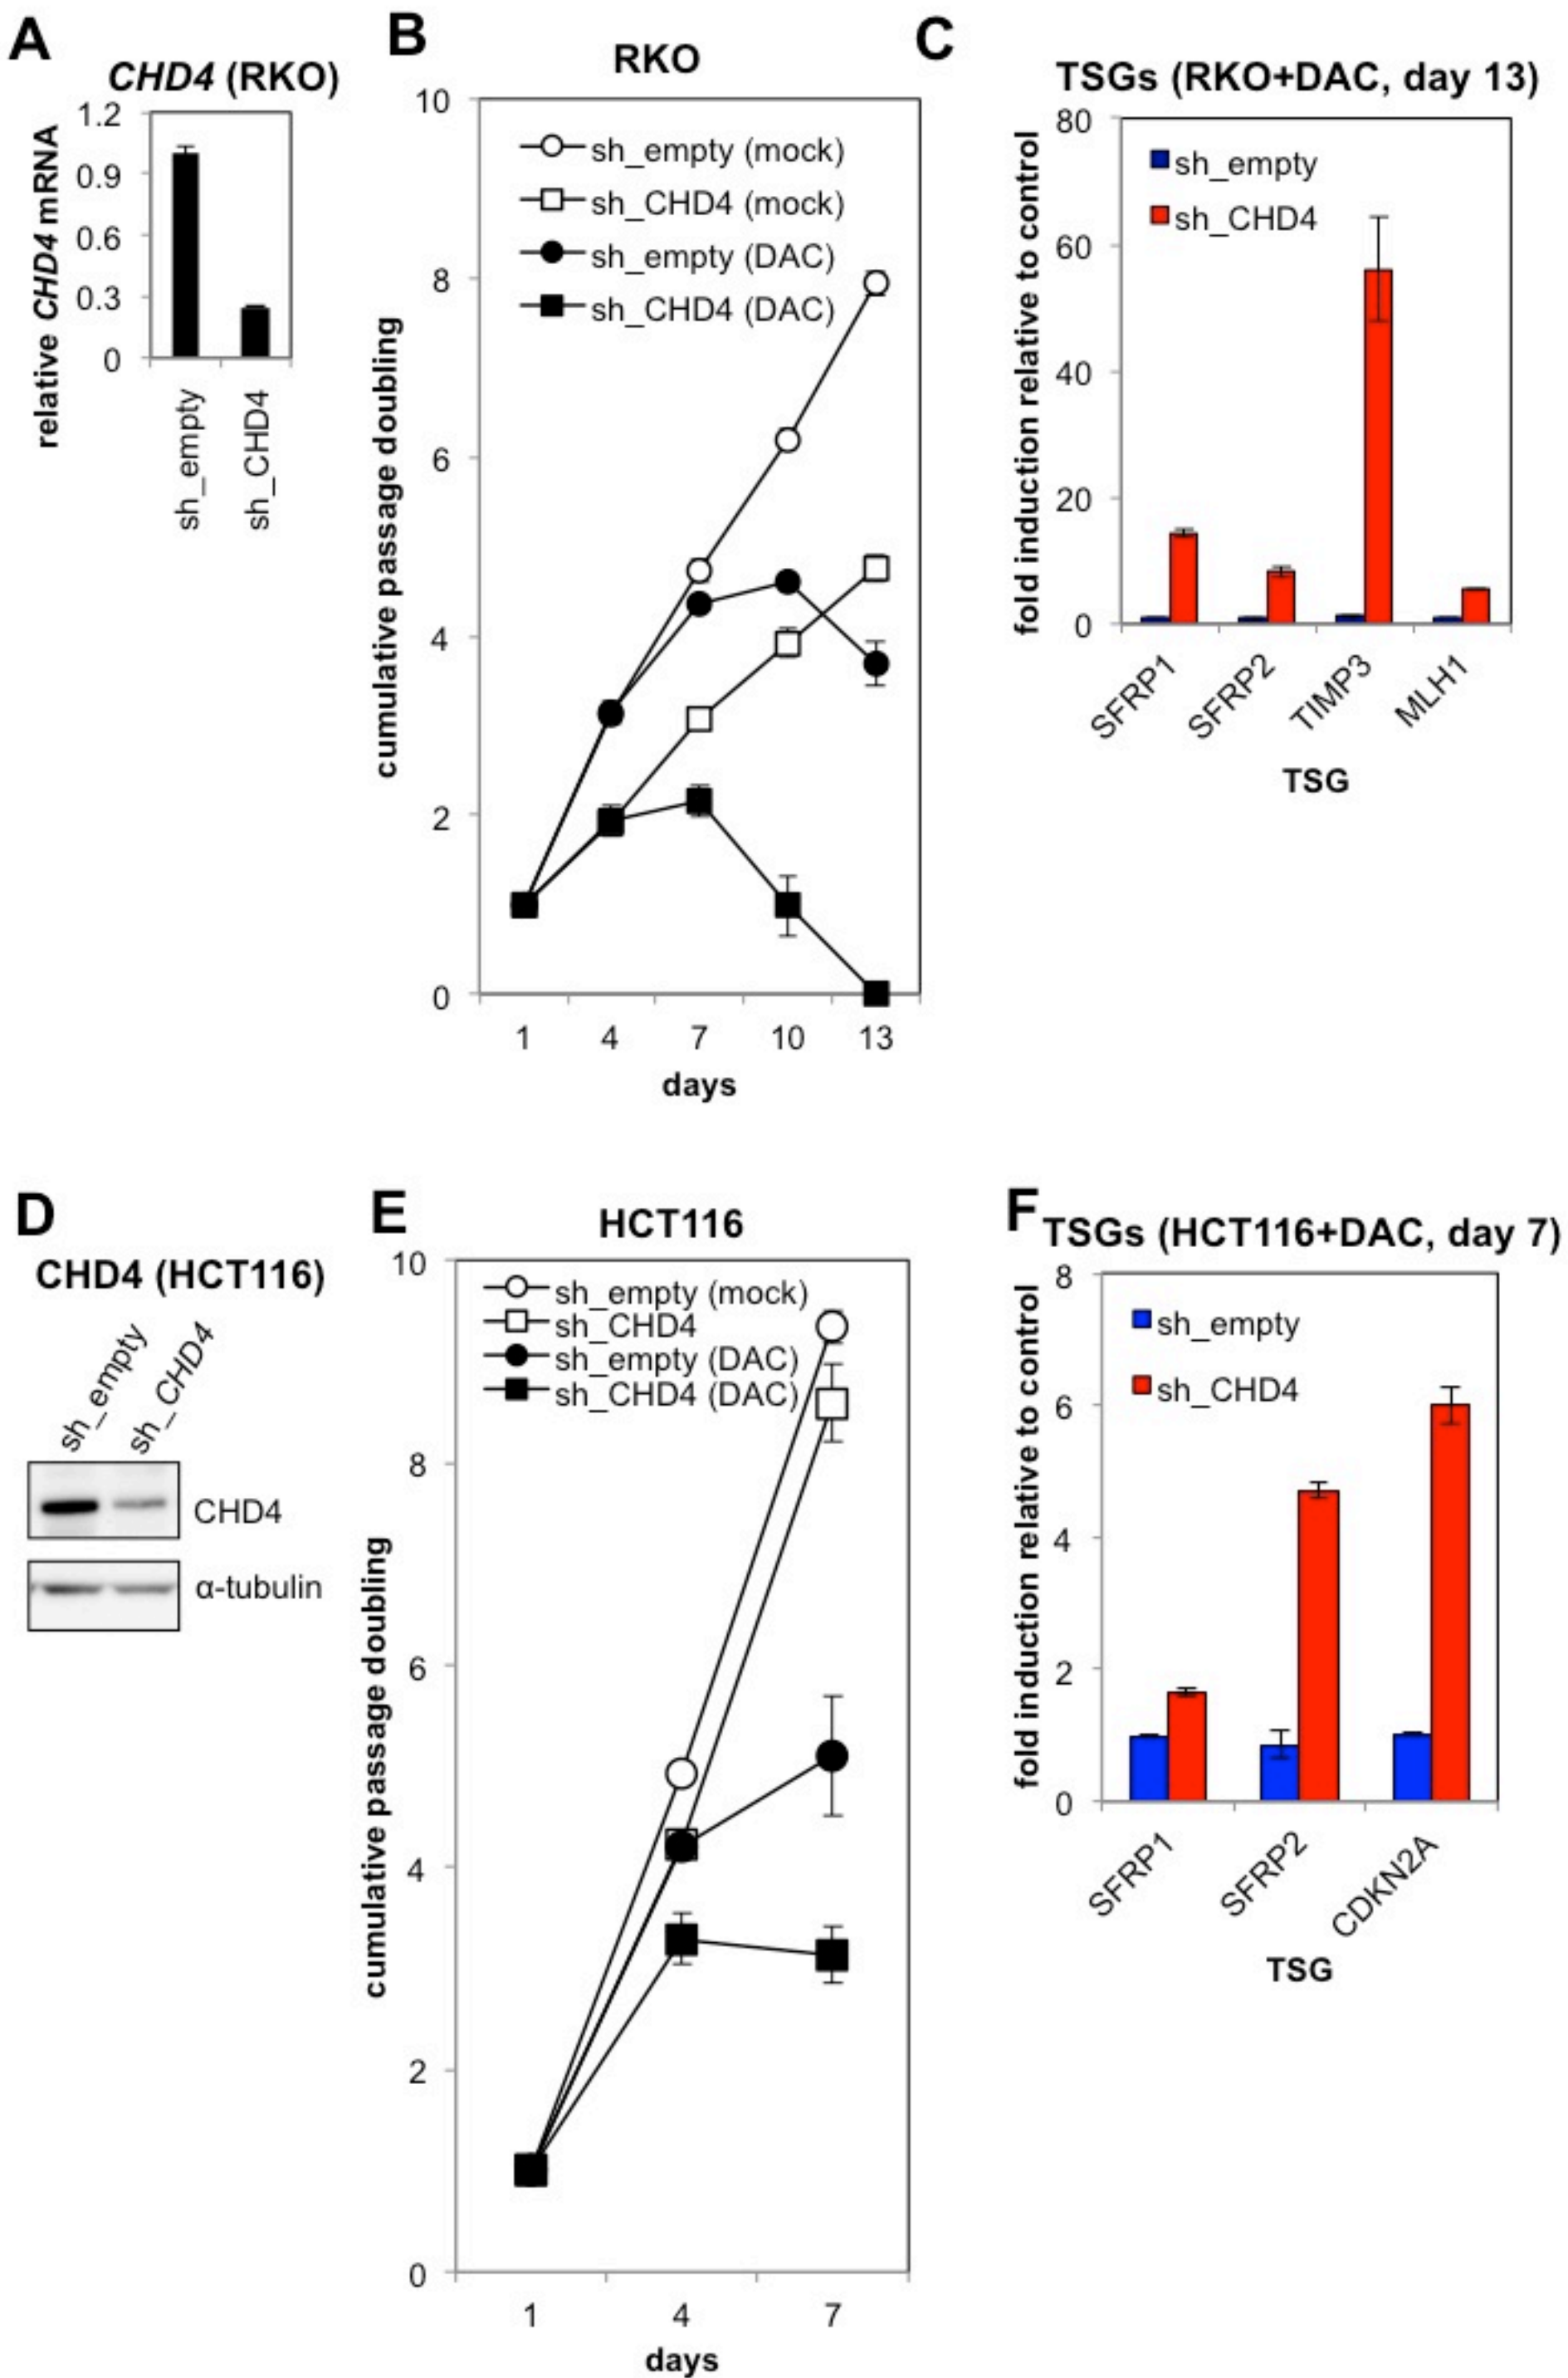

| <b>ensembl_gene_id</b> | <b>hgnc_symbol</b> |
|------------------------|--------------------|
| ENSG00000006611        | ACSBG1             |
| ENSG00000007350        | ADAMTS1            |
| ENSG00000010319        | ADAMTS2            |
| ENSG00000011201        | ALDH1L1            |
| ENSG00000012779        | ALOX5              |
| ENSG00000028137        | ANKRD36BP2         |
| ENSG00000048545        | ARHGEF25           |
| ENSG00000054219        | ATP1B2             |
| ENSG00000054356        | C14orf132          |
| ENSG00000061337        | C1orf61            |
| ENSG00000064300        | C5orf47            |
| ENSG00000073910        | C5orf58            |
| ENSG00000075043        | C7orf52            |
| ENSG00000080709        | CA9                |
| ENSG00000087116        | CACNG7             |
| ENSG00000095752        | CALY               |
| ENSG00000100593        | CAPN12             |
| ENSG00000101198        | CD248              |
| ENSG00000101204        | CD93               |
| ENSG00000101871        | CHRNA4             |
| ENSG00000102287        | COL6A2             |
| ENSG00000103740        | COX6B2             |
| ENSG00000104044        | CREB3L1            |
| ENSG00000104332        | CXorf48            |
| ENSG00000105122        | DPP6               |
| ENSG00000105605        | DPYSL3             |
| ENSG00000105696        | DPYSL5             |
| ENSG00000107159        | EHF                |
| ENSG00000108823        | ENOX1              |
| ENSG00000111452        | EPHB3              |
| ENSG00000113657        | EVL                |
| ENSG00000115590        | FAM127C            |
| ENSG00000116962        | FAM9A              |
| ENSG00000120658        | FAM9C              |
| ENSG00000125462        | FGA                |
| ENSG00000125810        | FRY                |
| ENSG00000129244        | GAB4               |
| ENSG00000129455        | GABRE              |
| ENSG00000130035        | GABRQ              |
| ENSG00000130226        | GALNT8             |

|                 |            |
|-----------------|------------|
| ENSG00000130508 | GBA3       |
| ENSG00000130592 | GBP5       |
| ENSG00000130643 | GIPC3      |
| ENSG00000131721 | GNG4       |
| ENSG00000131771 | GPR133     |
| ENSG00000133116 | GPR45      |
| ENSG00000134201 | GRASP      |
| ENSG00000135373 | GREM1      |
| ENSG00000135973 | GRIK4      |
| ENSG00000137285 | GRIN2A     |
| ENSG00000140538 | GSTM5      |
| ENSG00000141750 | GUCA1A     |
| ENSG00000142173 | HEYL       |
| ENSG00000143867 | HKDC1      |
| ENSG00000144908 | HMX1       |
| ENSG00000145832 | IGF2       |
| ENSG00000147402 | IL11       |
| ENSG00000149131 | IL1R2      |
| ENSG00000149403 | IL1RAPL1   |
| ENSG00000154451 | IL24       |
| ENSG00000154734 | IRX1       |
| ENSG00000156510 | ISM2       |
| ENSG00000157570 | ITGB2      |
| ENSG00000157613 | ITGBL1     |
| ENSG00000157851 | KAL1       |
| ENSG00000160191 | KCNN2      |
| ENSG00000160255 | KCNQ2      |
| ENSG00000160471 | KCNS3      |
| ENSG00000160472 | KL         |
| ENSG00000161835 | KLK8       |
| ENSG00000162738 | LCK        |
| ENSG00000162892 | LGI3       |
| ENSG00000163909 | LSP1       |
| ENSG00000163914 | LY75       |
| ENSG00000164736 | LZTS1      |
| ENSG00000166402 | MAF        |
| ENSG00000166501 | MID1       |
| ENSG00000166532 | MRGPRF     |
| ENSG00000166923 | MYBPHL     |
| ENSG00000167011 | NBEA       |
| ENSG00000167207 | NCRNA00226 |



|                        |              |
|------------------------|--------------|
| ENSG00000167244        | NGFR         |
| ENSG00000168243        | NID1         |
| ENSG00000168481        | NKAIN4       |
| ENSG00000168930        | NMUR1        |
| ENSG00000169302        | NOD2         |
| ENSG00000169306        | NTRK3        |
| ENSG00000169551        | NUP62CL      |
| ENSG00000170549        | OCA2         |
| ENSG00000170745        | OSR1         |
| ENSG00000171227        | PCP4L1       |
| ENSG00000171560        | PDE9A        |
| ENSG00000171596        | PLK5         |
| ENSG00000172915        | PPP1R1B      |
| ENSG00000172935        | PRKCB        |
| ENSG00000174807        | PSG9         |
| ENSG00000176887        | PTPRN        |
| ENSG00000178573        | PXDN         |
| ENSG00000178726        | RASAL3       |
| ENSG00000179855        | RFPL4A       |
| ENSG00000180739        | RHO          |
| ENSG00000181291        | RHOXF2       |
| ENSG00000182472        | RIMKLB       |
| ENSG00000182580        | RTN4RL1      |
| ENSG00000182866        | S1PR3        |
| ENSG00000183160        | S1PR5        |
| ENSG00000183304        | SEMA3G       |
| ENSG00000183439        | SERPING1     |
| <b>ENSG00000183454</b> | <b>SFRP1</b> |
| ENSG00000183668        | SGCA         |
| ENSG00000184905        | SLC25A48     |
| ENSG00000185037        | SMPD4P1      |
| ENSG00000185056        | SNAI1P1      |
| ENSG00000185177        | SNX18P15     |
| ENSG00000185924        | SOX11        |
| <b>ENSG00000185988</b> | <b>SOX17</b> |
| ENSG00000187268        | STAC2        |
| ENSG00000196405        | STK32A       |
| ENSG00000196593        | TCEAL2       |
| ENSG00000197123        | THBD         |
| ENSG00000198088        | TKTL1        |
| ENSG00000198542        | TMEM119      |

|                        |               |
|------------------------|---------------|
| ENSG00000204603        | TMEM132E      |
| ENSG00000212747        | TMEM158       |
| ENSG00000213694        | TMEM190       |
| ENSG00000214049        | TMEM37        |
| ENSG00000215568        | TMEM59L       |
| ENSG00000215612        | TNFRSF1B      |
| ENSG00000218014        | TRIM49        |
| ENSG00000221180        | TRIM61        |
| ENSG00000221986        | TSPAN18       |
| ENSG00000223553        | TUB           |
| ENSG00000223638        | TUBB2B        |
| ENSG00000223831        | UCA1          |
| ENSG00000223977        | USH1C         |
| <b>ENSG00000225015</b> | <b>VANGL2</b> |
| ENSG00000226364        | VN2R19P       |
| ENSG00000227051        | ZNF479        |
| ENSG00000229084        | ZNF679        |
| <b>ENSG00000230006</b> | <b>SFRP2</b>  |
| ENSG00000231254        |               |
| ENSG00000234062        |               |
| ENSG00000234511        |               |
| ENSG00000235974        |               |
| ENSG00000236345        |               |
| ENSG00000236516        |               |
| ENSG00000236669        |               |
| ENSG00000237194        |               |
| ENSG00000237271        |               |
| ENSG00000237412        |               |
| ENSG00000240771        |               |
| ENSG00000248485        |               |
| ENSG00000249790        |               |
| ENSG00000249948        |               |
| ENSG00000249992        |               |
| ENSG00000251127        |               |
| ENSG00000253315        |               |
| ENSG00000253595        |               |
| ENSG00000254533        |               |
| ENSG00000258732        |               |
| ENSG00000145423        |               |

## Legend of supporting information

### Figure S1 Validation of HDAC1 as a repressor of TSGs.

(A) Knockdown efficiency of the HDAC siRNA library. The knockdown abilities of the siRNA pools targeting *HDAC1-11* are depicted as the relative mRNA remaining compared to scrambled siRNA pools (see also Figure 1A). *HDAC9* is not expressed in RKO cells. (B) *HDAC1* and *HDAC2* siRNA pools enhance DAC-induced reactivation of *MLH1*. RKO cells were transfected with scrambled siRNA or a siRNA pools targeting *MLH1*, split and then treated with or without 100nM DAC. *MLH1* expression was determined by QRT-PCR and normalized to control. (C-D) All four *HDAC1* siRNAs induce reactivation of TSGs in combination with DAC and induce knockdown of *HDAC1*. RKO cells were transfected with scrambled or deconvoluted *HDAC1* or *HDAC2* siRNA pools, split and treated with or without 1 $\mu$ M DAC. Expression of indicated TSGs (C), *HDAC1* and 2 (D) was determined by QRT-PCR. TSG QRT-PCR values were Log10 transformed, *HDAC1* and 2 QRT-PCR values were normalized to control.

### Figure S2 HDAC1 requires the NuRD complex for silencing of TSGs.

(A) *CHD4* siRNA pools induce depletion of CHD4. RKO cells were transfected with scrambled (CONT1 and 2), *HDAC1*, *HDAC2*, *CHD3* and *CHD4* siRNA pools. CHD4 protein expression was analyzed by western blotting,  $\beta$ -actin serves as a loading control. (B-D) Three *CHD4* siRNAs induce knockdown of *CHD4* but not *HDAC1* and reactivate TSGs expression in combination with DAC. RKO cells were transfected with scrambled (CONT1), and deconvoluted *CHD4* siRNA pools, split and treated with or without 1 $\mu$ M DAC. Expression of indicated TSGs (B), *CHD4* (C) and *HDAC1* (D) was determined by QRT-PCR. TSG QRT-PCR values were Log10 transformed, *CHD4* and *HDAC1* QRT-PCR values were normalized to control. Error bars denote SD.

**Figure S3** DNMT1 and NuRD physically interact in RKO cells.

DNMT1 interacts with the NuRD complex in RKO cells. Nuclear extracts from RKO cells were immunoprecipitated with antibodies against either NuRD complex subunits (left) or DNMT1 (right). Immunoprecipitates were immunoblotted using the indicated antibodies.

**Figure S4** Silencing of *SFRP1* and *SFRP5* in HCT116 cells does not rely on functional cooperation between CHD4 and either DNMT1 or DNMT3B.

Wild-type, *DNMT1* hypomorphic or *DNMT3B*<sup>-/-</sup> HCT116 cells were transduced with an empty vector or a functional shRNA targeting *CHD4*. Expression of *SFRP1* and *SFRP5* was analyzed by QRT-PCR and is represented as fold induction over empty vector. Error bars denote standard deviation (SD).

**Figure S5** DNMTs and NuRD occupy promoters of TSGs.

(A) DNMT1, DNMT3B, HDAC1 and CHD4 associate with the proximal promoters of TSGs in HCT116 cells. (B) DNMT1, DNMT3B, HDAC1 and CHD4 associate with the proximal promoters of TSGs in RKO cells. Results are presented as percentage of input. Rabbit IgG served as a negative control. Error bars denote SD.

**Figure S6** DAC and knockdown of *CHD4* synergize in cell death induction, in correlation with reactivation of TSGs.

(A) *CHD4* shRNA induces depletion of *CHD4*. RKO cells were transduced with an empty vector or an shRNA targeting *CHD4*. *CHD4* knockdown was verified by examining *CHD4* mRNA levels by QRT-PCR. Error bars denote SD. (B) Knockdown of *CHD4* sensitizes RKO cells to DAC treatment. RKO cells expressing empty vector or *CHD4* shRNA were seeded for proliferation assays according to the 3T3 protocol in absence of drug or presence of 1 $\mu$ M DAC. Error bars denote SD. (C) Synergistic reactivation of TSGs in cells treated with DAC and depleted for *CHD4*. Expression of indicated TSGs were examined by QRT-PCR on DAC treated samples harvested on day 13 of the proliferation assay. Values are represented as fold

induction over empty vector. Error bars denote SD. (D) *CHD4* shRNA induces depletion of *CHD4*. HCT116 cells were transduced with an empty vector or an shRNA targeting *CHD4*. *CHD4* knockdown was verified by western blotting,  $\alpha$ -tubulin serves as a loading control. (E) Knockdown of *CHD4* sensitizes HCT116 cells to DAC treatment. HCT116 cells expressing empty vector or *CHD4* shRNA were seeded for proliferation assays according to the 3T3 protocol in absence of drug or presence of 1 $\mu$ M DAC. Error bars denote SD. (F) Synergistic reactivation of TSGs in cells treated with DAC and depleted for *CHD4*. Expression of indicated TSGs were examined by QRT-PCR on DAC treated samples harvested on day 7 of the proliferation assay. Values are represented as fold induction over empty vector. Error bars denote SD.

**Table S1** NuRD complex components and known DNMT1 interacting partners identified by tandem mass spectrometry from the DNMT1 immunoprecipitate of HCT116 cells.

Endogenous DNMT1 was immunoprecipitated from nuclear extracts of HCT116 cells and captured by protein A/G beads. Immunoprecipitates were extracted from protein A/G beads and resolved on SDS-PAGE. Protein gel bands were cut and in-gel digested with trypsin. Extracted peptides were analyzed by reversed-phase nanoflow LC-tandem mass spectrometry. The raw MS/MS data were searched using the SEQUEST cluster against a human IPI proteome database. M\*, methionine oxidation; C#, cysteine carboxyamidomethylation; MH+, monoisotopic mass of peptide with one proton; DeltaM (ppm), mass measurement error in terms of ppm; z, charge of peptide molecular ions; P (pro), probability for proteins; P (pep), probability for peptides; XC, cross-correlation score; DeltaCn, the difference of XCs between the top-matched peptide and second top-matched peptide.

**Table S2** List of oligonucleotide sequences used in this study.

**Table S3** List of antibodies used in this study.

**Dataset S1** List of genes reactivated by DNMT inhibition and depletion of *HDAC1* or *CHD4*. Transcripts enhanced in DAC-induced reactivation by *CHD4* or *HDAC1* knockdown (see methods for cut-off criteria). (A) Transcripts enhanced in DAC-induced reactivation by *HDAC1* knockdown. (B) Transcripts enhanced in DAC-induced reactivation by *CHD4* knockdown. (C) Transcripts enhanced in DAC-induced reactivation by both *HDAC1* and *CHD4* knockdown: 40% of target genes overlap. Positive control TSGs and WNT inhibitors are highlighted in yellow.

## Supplementary Methods:

### Chromatin immunoprecipitation (ChIP)

Both the Baylin Lab and the Bernards lab obtained similar NuRD and DNMT ChIP results with different protocols. In the Bernards Lab, ChIP experiments were performed using the SimpleChIP enzymatic chromatin IP kit (Cell signaling technologies) using the manufacturer's instructions with some minor adjustments.  $10^7$  RKO cells were fixed with 1% formaldehyde (Merck) for 15' room temperature (RT) at a rotating platform. Nuclei were incubated with 7ul micrococcal nuclease for 30' at 37 C. Nuclei were sheared with the Diagenode Biorupter using the low output setting and 15 cycles (30s on, 30s off) of sonication. The ChIP protocol in the Baylin Lab was described previously with minor adjustments in the washing steps(49). For DNMT1 ChIP, wash 5 times with low salt wash buffer; for DNMT3B ChIP, first wash with low salt wash buffer for 4 times, then wash with high salt wash buffer twice; for HDAC1 and CHD4 ChIP, first wash with low salt wash buffer for 4 times, then wash with high salt wash buffer once.

### Re-ChIP

The re-ChIP protocol is described previously with modification in the first ChIP elution step (Truax and Greer, *Methods Mol. Biol.*, 2012, 809:175-88). For the DNMT3B re-ChIP assay, DNMT3B antibody immunogen peptide (ENKTRRRRTADDSATS) was used to elute the chromatin complex from the magnetic beads after the first ChIP. For DNMT1 ChIP, as the elution efficiency of Sigma DNMT1 antibody (D4692) immunogen peptide is very low, we first ChIP FLAG-DNMT1 in a FLAG-DNMT1 stable cell line in HCT116 cells (49) with anti-FLAG magnetic beads (Sigma) and then elute with FLAG peptide (Sigma). For peptide elution, first dissolve peptide in 0.5 M Tris HCl (pH 7.5) with 1 M NaCl at a concentration of 25 mg/ml. Dilute 5-fold with water to prepare a peptide stock solution containing 5 mg/ml of immunogen peptide. For ChIP elution, add 3 ul of 5 mg/ml of immunogen peptide stock solution to 100 ul of TBS (50 mM Tris pH 7.5, 150 mM NaCl) to reach 150 ng/ml final concentration, then add it to chromatin-bound magnetic beads and rotate at 4C for 1 hour for elution.

**Table S1.** NuRD complex components identified by tandem mass spectrometry from the DNMT1 immunoprecipitate of HCT116 cells.

Endogenous DNMT1 was immunoprecipitated from nuclear extracts of HCT116 cells and captured by protein A/G beads. Immunoprecipitates were extracted from protein A/G beads and resolved on SDS-PAGE. Protein gel bands were cut and in-gel digested with trypsin. Extracted peptides were analyzed by reversed-phase nanoflow LC-tandem mass spectrometry. The raw MS/MS data were searched using the SEQUEST cluster against a human IPI proteome database. M\*, methionine oxidation; C#, cysteine carboxyamidomethylation; MH+, monoisotopic mass of peptide with one proton; DeltaM (ppm), mass measurement error in terms of ppm; z, charge of peptide molecular ions; P (pro), probability for proteins; P (pep), probability for peptides; XC, cross-correlation score; DeltaCn, the difference of XCs between the top-matched peptide and second top-matched peptide.

| Gene        | Protein                                            |           |              |   | P (pro)         | Score         |         |
|-------------|----------------------------------------------------|-----------|--------------|---|-----------------|---------------|---------|
| Scan #      | Peptide                                            | MH+       | DeltaM (ppm) | z | P (pep)         | XC            | DeltaCn |
| <b>CHD4</b> | <b>Chromodomain-helicase-DNA-binding protein 4</b> |           |              |   | <b>3.38E-09</b> | <b>220.23</b> |         |
| 674         | K.FAEM*EER.F                                       | 927.3877  | -1.4229      | 2 | 3.15E-03        | 2.68          | 0.36    |
| 802         | K.FAEM*EER.F                                       | 927.3877  | -1.4229      | 2 | 8.97E-03        | 2.53          | 0.44    |
| 949         | R.KEEEEEDDDDDDSKEPK.S                              | 2051.8047 | -0.6034      | 3 | 7.31E-08        | 4.13          | 0.88    |
| 973         | K.QVNYNDGSQEDR.D                                   | 1424.6037 | 2.0632       | 2 | 5.56E-06        | 2.75          | 0.69    |
| 997         | R.TEPM*ETEPK.G                                     | 1206.5195 | -0.6103      | 2 | 1.60E-03        | 2.73          | 0.58    |
| 1126        | K.ERTEPM*ETEPK.G                                   | 1491.6632 | 0.0609       | 2 | 9.23E-03        | 2.96          | 0.56    |
| 1127        | K.ERTEPM*ETEPK.G                                   | 1491.6632 | 0.0609       | 2 | 6.57E-04        | 3.04          | 0.50    |
| 1178        | R.EEEM*GEEEEVER.E                                  | 1510.5850 | -0.2196      | 2 | 1.12E-06        | 3.09          | 0.66    |
| 1179        | R.EEEM*GEEEEVER.E                                  | 1510.5850 | -0.2196      | 2 | 3.20E-07        | 3.74          | 0.69    |
| 1180        | R.EEEM*GEEEEVER.E                                  | 1510.5850 | -0.2196      | 2 | 1.34E-06        | 3.86          | 0.68    |
| 1283        | R.IDGGITGNM*R.Q                                    | 1049.5044 | -0.4439      | 2 | 3.01E-06        | 3.23          | 0.53    |
| 1284        | R.VELSPM*QK.K                                      | 947.4866  | -0.0903      | 2 | 1.83E-03        | 2.63          | 0.35    |
| 1286        | R.IDGGITGNM*R.Q                                    | 1049.5044 | -0.4439      | 2 | 5.53E-06        | 3.49          | 0.53    |
| 1376        | K.GAADVEKVEEK.S                                    | 1174.5950 | -0.3034      | 2 | 7.30E-04        | 3.80          | 0.43    |
| 1442        | K.EVM*LQNGETPK.D                                   | 1261.6093 | 0.5978       | 2 | 8.72E-04        | 2.57          | 0.36    |
| 1444        | K.EVM*LQNGETPK.D                                   | 1261.6093 | 0.5978       | 2 | 7.15E-03        | 3.03          | 0.36    |
| 1501        | K.VAQYVVR.E                                        | 834.4832  | 1.0992       | 1 | 1.80E-03        | 2.04          | 0.43    |
| 1532        | R.APEPTPQQVAQQQ.-                                  | 1421.7019 | -0.0727      | 2 | 9.04E-04        | 3.17          | 0.53    |
| 1534        | R.APEPTPQQVAQQQ.-                                  | 1421.7019 | -0.0727      | 2 | 2.44E-04        | 3.66          | 0.55    |
| 1618        | R.WQDIQNDPR.Y                                      | 1171.5491 | -0.8878      | 2 | 1.34E-07        | 3.13          | 0.45    |
| 1619        | R.WQDIQNDPR.Y                                      | 1171.5491 | -0.8878      | 2 | 2.10E-06        | 3.48          | 0.46    |
| 2355        | K.QLEELLSDM*K.A                                    | 1221.6031 | 0.3541       | 2 | 1.55E-03        | 2.70          | 0.35    |



|                |                                            |           |         |   |                 |              |      |
|----------------|--------------------------------------------|-----------|---------|---|-----------------|--------------|------|
| 2357           | K.QLEELLSDM*K.A                            | 1221.6031 | 0.3541  | 2 | 5.45E-04        | 2.89         | 0.34 |
| 2493           | R.ENEFSEFNDAIR.G                           | 1470.6496 | -0.5671 | 2 | 6.03E-07        | 3.50         | 0.63 |
| 2494           | R.ENEFSEFNDAIR.G                           | 1470.6496 | -0.5671 | 2 | 3.26E-07        | 3.82         | 0.58 |
| 2635           | K.AFLNAIM*R.Y                              | 951.5080  | -0.6471 | 2 | 9.79E-05        | 2.84         | 0.35 |
| 2637           | K.AFLNAIM*R.Y                              | 951.5080  | -0.6471 | 2 | 4.07E-03        | 2.74         | 0.30 |
| 2700           | K.SAIDLTPIVVEDK.E                          | 1399.7679 | 0.1619  | 2 | 3.38E-09        | 3.68         | 0.53 |
| 2703           | K.SAIDLTPIVVEDK.E                          | 1399.7679 | 0.1619  | 2 | 9.24E-08        | 3.52         | 0.50 |
| 2755           | K.AFLNAIM*R.Y                              | 951.5080  | -0.6471 | 2 | 7.04E-04        | 2.72         | 0.28 |
| 2829           | R.VGGNIEVLGFNAR.Q                          | 1345.7223 | 0.0468  | 2 | 6.54E-04        | 4.12         | 0.54 |
| 2904           | R.VGGNIEVLGFNAR.Q                          | 1345.7223 | -0.2253 | 2 | 2.13E-04        | 3.60         | 0.54 |
| 3006           | R.IGVM*SLIR.K                              | 904.5284  | -0.1579 | 2 | 5.52E-03        | 2.58         | 0.39 |
| 3367           | K.LLEQALVIEEQLR.R                          | 1553.8897 | 1.0755  | 2 | 7.83E-09        | 4.52         | 0.50 |
| 3371           | K.LLEQALVIEEQLR.R                          | 1553.8897 | 0.9969  | 2 | 7.45E-09        | 3.93         | 0.49 |
| 3456           | K.LLEQALVIEEQLR.R                          | 1553.8897 | 0.6827  | 2 | 3.01E-06        | 3.80         | 0.54 |
| 3579           | R.GGGNQVSLLNVVM*DLK.K                      | 1659.8734 | 0.3848  | 2 | 9.76E-06        | 4.09         | 0.63 |
| 3580           | R.GGGNQVSLLNVVM*DLK.K                      | 1659.8734 | 0.3848  | 2 | 8.28E-06        | 3.97         | 0.63 |
| 3694           | R.GGGNQVSLLNVVM*DLK.K                      | 1659.8734 | 0.3113  | 2 | 7.15E-07        | 4.05         | 0.58 |
| 4060           | K.GPFLVSAPLSTIINWER.E                      | 1900.0327 | 0.6702  | 2 | 4.95E-08        | 3.27         | 0.70 |
| <b>MTA1</b>    | <b>Metastasis-associated protein MTA1</b>  |           |         |   | <b>1.97E-07</b> | <b>70.20</b> |      |
| 1170           | R.ALDC#SSSVR.Q                             | 994.4622  | 0.9058  | 2 | 7.59E-04        | 2.93         | 0.41 |
| 1846           | K.NIYDISK.A                                | 852.4462  | 1.9421  | 1 | 6.81E-03        | 1.89         | 0.07 |
| 2503           | R.LPEASQSPLVLK.Q                           | 1281.7413 | 0.6509  | 2 | 4.14E-06        | 3.65         | 0.38 |
| 2711           | K.C#SVTLLNETESLK.S                         | 1493.7516 | 2.2391  | 2 | 1.97E-07        | 3.73         | 0.21 |
| 2949           | R.YQADITDLLK.E                             | 1179.6256 | 1.8250  | 2 | 2.54E-05        | 2.94         | 0.18 |
| 2968           | K.SVSSVLSSLTPAK.V                          | 1275.7155 | 1.8524  | 2 | 3.06E-07        | 3.24         | 0.46 |
| 3314           | R.DISSTLIALADK.H                           | 1246.6889 | 2.1393  | 2 | 1.31E-05        | 3.08         | 0.69 |
| 3316           | R.DISSTLIALADK.H                           | 1246.6889 | 2.1393  | 2 | 5.88E-05        | 4.03         | 0.68 |
| <b>GATAD2A</b> | <b>Transcriptional repressor p66-alpha</b> |           |         |   | <b>5.05E-10</b> | <b>60.21</b> |      |
| 845            | R.ATEATAM*AM*GR.G                          | 1141.4976 | 1.8057  | 2 | 4.11E-06        | 3.64         | 0.65 |
| 1091           | R.DPTEDDVESK.K                             | 1134.4797 | 1.4693  | 2 | 2.24E-07        | 3.40         | 0.60 |
| 1096           | R.DPTEDDVESK.K                             | 1134.4797 | 1.4693  | 2 | 1.88E-07        | 3.59         | 0.65 |
| 1178           | K.PSLQTSSAR.M                              | 946.4952  | 1.1512  | 2 | 5.08E-06        | 2.75         | 0.28 |
| 1181           | K.PSLQTSSAR.M                              | 946.4952  | 1.1512  | 2 | 1.35E-03        | 2.88         | 0.27 |
| 1418           | R.LLQQGTAPAQAK.A                           | 1225.6899 | 1.8556  | 2 | 9.65E-05        | 3.35         | 0.61 |
| 1419           | R.LLQQGTAPAQAK.A                           | 1225.6899 | 1.8556  | 2 | 1.88E-07        | 3.64         | 0.60 |
| 1422           | R.LLQQGTAPAQAK.A                           | 1225.6899 | 1.8556  | 2 | 2.87E-06        | 3.90         | 0.59 |

|                |                                            |           |        |   |                 |              |      |
|----------------|--------------------------------------------|-----------|--------|---|-----------------|--------------|------|
| 1563           | K.ALQQEQEIEQR.L                            | 1371.6863 | 2.7907 | 2 | 4.68E-07        | 3.10         | 0.55 |
| 1892           | K.LQNSASATALVSR.T                          | 1317.7121 | 2.8565 | 2 | 5.32E-10        | 3.85         | 0.67 |
| 1895           | K.LQNSASATALVSR.T                          | 1317.7121 | 2.8565 | 2 | 5.05E-10        | 4.28         | 0.68 |
| <b>MTA2</b>    | <b>Metastasis-associated protein MTA2</b>  |           |        |   | <b>7.51E-13</b> | <b>40.19</b> |      |
| 954            | R.LVEGESDNR.N                              | 1018.4800 | 1.7264 | 2 | 1.33E-06        | 2.87         | 0.58 |
| 1427           | K.TPTQLEGATR.G                             | 1073.5586 | 2.0056 | 2 | 9.83E-05        | 2.75         | 0.50 |
| 2167           | K.TLLADQGEIR.V                             | 1115.6055 | 1.3155 | 2 | 1.21E-05        | 2.78         | 0.57 |
| 2764           | K.LNPADAPNPVVFVATK.D                       | 1652.9006 | 4.3134 | 2 | 7.51E-13        | 3.19         | 0.67 |
| 2765           | K.LNPADAPNPVVFVATK.D                       | 1652.9006 | 4.3134 | 2 | 1.55E-09        | 3.72         | 0.71 |
| <b>GATAD2B</b> | <b>Transcriptional repressor p66-beta</b>  |           |        |   | <b>1.00E-30</b> | <b>40.29</b> |      |
| 1453           | K.ENINDEPVDM*SAR.R                         | 1505.6537 | 1.9932 | 2 | 1.98E-08        | 3.72         | 0.75 |
| 1455           | K.ENINDEPVDM*SAR.R                         | 1505.6537 | 1.9932 | 2 | 3.81E-07        | 4.38         | 0.74 |
| 1535           | K.ALQQEQEIEQR.L                            | 1371.6863 | 1.8118 | 2 | 3.76E-07        | 3.21         | 0.54 |
| 2036           | R.VIAPNPAQLQGQR.G                          | 1391.7754 | 0.5732 | 2 | 3.80E-11        | 2.97         | 0.77 |
| 2140           | R.LQQQAALSPTTAPAVSSVSK.Q                   | 1984.0709 | 0.5662 | 2 | 1.00E-30        | 4.63         | 0.69 |
| 2142           | R.LQQQAALSPTTAPAVSSVSK.Q                   | 1984.0709 | 0.5662 | 2 | 9.92E-09        | 5.77         | 0.77 |
| <b>MBD3</b>    | <b>Methyl-CpG-binding domain protein 3</b> |           |        |   | <b>2.27E-10</b> | <b>30.24</b> |      |
| 1507           | R.KQEELVQQVR.K                             | 1256.6957 | 0.8748 | 2 | 9.96E-04        | 3.32         | 0.38 |
| 1510           | R.KQEELVQQVR.K                             | 1256.6957 | 0.8748 | 2 | 2.22E-03        | 3.30         | 0.35 |
| 2157           | K.GKPDLTALPVR.Q                            | 1280.7321 | 0.9470 | 2 | 6.55E-08        | 3.57         | 0.63 |
| 2159           | K.GKPDLTALPVR.Q                            | 1280.7321 | 0.9470 | 2 | 4.26E-07        | 3.47         | 0.61 |
| 3909           | K.LSGLNAFDIAEELVK.T                        | 1618.8687 | 6.5824 | 2 | 2.27E-10        | 4.65         | 0.69 |
| 3911           | K.LSGLNAFDIAEELVK.T                        | 1618.8687 | 6.5824 | 2 | 2.03E-09        | 4.77         | 0.65 |

**Table S2** List of oligonucleotide sequences used in this study.

| <b>qRT-PCR primers</b>          |                                                    |                             |
|---------------------------------|----------------------------------------------------|-----------------------------|
|                                 |                                                    |                             |
| <b>TARGET GENE</b>              | <b>SENSE (5'-3')</b>                               | <b>ANTISENSE (3-5')</b>     |
| <i>GAPDH</i>                    | AAGGTGAAGGTCGGAGTCAA                               | AATGAAGGGGTCATTGATGG        |
| <i>RPL4</i>                     | GCTCTGGCCAGGGTGCTTTTG                              | ATGGCGTATCGTTTTTGGGTTGT     |
| <i>PGK</i>                      | ATTAGCCGAGCCAGCCAAAATAG                            | TCATCAAAAACCCACCAGCCTTCT    |
| <i>HPRT</i>                     | ACCCTTTCCAAATCCTCAGC                               | GTTATGGCGACCCCGAG           |
| <i>P16INK4A</i>                 | GGGTCGGGTGAGAGTGG                                  | CGAATAGTTACGGTCGGAGG        |
| <i>SFRP1</i>                    | GGCTTCTTCTTCTTGGGGAC                               | ATCTCTGTGCCAGCGAGTTT        |
| <i>SFRP2</i>                    | TCTTGCTCTGGTCTCCAGG                                | CGACATAATGGAAAACGCTTTG      |
| <i>SFRP4</i>                    | CCCGGAGGATGTTAAGTGGAT                              | GCTGAGATACGTTGCCAAAGTT      |
| <i>SFRP5</i>                    | CTTTTTCTGGGCTCCAATCA                               | AGCAGATGTGCTCCAGTGAC        |
| <i>MLH1</i>                     | CCACGAAGGAGTGGTTATGC                               | ATGACTGCAGCTTGTACCCC        |
| <i>HDAC1</i>                    | ACCCGGAGGAAAAGTCTGTTAC                             | GGTAGAGACCATAGTTGAGCAGC     |
| <i>HDAC2</i>                    | GCTCTCAACTGGCGGTTTCCAG                             | AGCCCAATTAACAGCCATATCAG     |
| <i>HDAC3</i>                    | GCAAGGCTTCACCAAGAGTC                               | CTGTGTAACGCGAGCAGAAC        |
| <i>HDAC4</i>                    | GACCTGACCGCCATTTGC                                 | GGGAGAGGATCAAGCTCGTTT       |
| <i>HDAC5</i>                    | GGGAACCATCCTTGGAATC                                | GAAGTGGGCATGGCTCTTG         |
| <i>HDAC6</i>                    | CCGGAGGGTCTTATCGTAG                                | GCGGTGGATGGAGAAATAGA        |
| <i>HDAC7</i>                    | AGCAGCTTTTTGCCTCCTGTT                              | TCTTGCGCAGAGGGGAAGTG        |
| <i>HDAC8</i>                    | TTTGAGCGTATTCTCTACGTGGA                            | ACACTGTAGTACCGTCCCTTC       |
| <i>HDAC9</i>                    | GAGTACCTTGAAGCATTACAGGAC                           | CGTCACTTTGTACCCTCCTAGAG     |
| <i>HDAC10</i>                   | GCTACCACCTGGAGTCACTG                               | CTCTAGGGCACTCTGACATGG       |
| <i>HDAC11</i>                   | GCACACGAGGCGCTATCTTA                               | AAGGAAGTTGGGGAGGAAGA        |
| <i>TIMP2</i>                    | AACGACATTTATGGCAACCCCT                             | CTTCTCAGGCCCTTTGAACAT       |
| <i>TIMP3</i>                    | ATGGTGTAGACCAGCGTGC                                | AGGACGCCTTCTGCAACTC         |
| <i>RCOR1</i>                    | GATTGGGTGACCAGACCAAC                               | GTCGGACCCCACTACCAG          |
| <i>CHD4</i>                     | ATGTTCAAGTAAGCAGCCCG                               | CCATCCTCAATGAGCCTTTC        |
| <i>CHD3</i>                     | GAAGTCTCTCCATTTGGCCC                               | AAAGCCTTCAGCCAGTTCAT        |
| <i>SIN3A</i>                    | TGCTCAGGGATGCACTACAA                               | GCTGAGAGGGACACGCAGT         |
| <i>GAPDH</i>                    | AAGGTGAAGGTCGGAGTCAA                               | AATGAAGGGGTCATTGATGG        |
| <i>HDAC1 (human specific)</i>   | AGGACTGTCCAGTATTCGATGG                             | CTCGGACTTCTTTGCATGGTG       |
| <i>P53</i>                      | CCGCAGTCAGATCCTAGCG                                | AATCATCCATTGCTTGGGACG       |
|                                 |                                                    |                             |
| <b>ChIP primers</b>             |                                                    |                             |
|                                 |                                                    |                             |
| <b>TARGET PROMOTER</b>          | <b>SENSE (5'-3')</b>                               | <b>ANTISENSE (3-5')</b>     |
| <i>MLH1</i>                     | CCCAGCAACCCACAGAGTTGAG                             | CGGAAGTGCCCTTCAGCCAATC      |
| <i>p16INK4A</i>                 | GATTATAGACGTGAGCCACCGC                             | AGGCAGGAGAATCGCTTGAAC       |
| <i>SFRP1</i>                    | GCACCGCAGCTAGAGAACCGA                              | CTGCTTCCTAATTTCAACCAACAGCCC |
| <i>SFRP2</i>                    | TGGCAACCCAGCAGAACTTC                               | ACGCGCTTGCTGGAAGGGAATTC     |
| <i>SFRP4</i>                    | GCCCCCTACCGGAGAAAGCAAAT<br>A                       | CGGATACAAGAGGGTGCGGGGAGAG   |
| <i>TIMP2</i>                    | CCCGGCTAATTTCTTGTGTTTT                             | GAGCGAGACTCCATCTCAAAAG      |
| <i>TIMP3</i>                    | ACAGGATGAAGCGGAAGAGA                               | ATTTCCCTGAACGTCAGCAG        |
|                                 |                                                    |                             |
| <b>pLKO.1 knockdown vectors</b> |                                                    |                             |
|                                 |                                                    |                             |
| <b>TARGET</b>                   | <b>FULL HAIRPIN SEQUENDE</b>                       |                             |
| <i>HDAC1#1</i>                  | CCGGGCCGGTCATGTCCAAAGTA<br>ATCTCGAGATTACTTTGGACATG |                             |

|                |                                                                   |  |
|----------------|-------------------------------------------------------------------|--|
|                | ACCGGCTTTTT                                                       |  |
| <i>HDAC1#2</i> | CCGGCCGCAAGAACTCTTCCAAC<br>TTCTCGAGAAGTTGGAAGAGTTC<br>TTGCCGTTTTT |  |
| <i>CHD4#1</i>  | CCGGGCTGACACAGTTATTATCT<br>ATCTCGAGATAGATAATAACTGT<br>GTCAGCTTTTT |  |
| <i>CHD4#2</i>  | CCGGGCGGGAGTTCAGTACCAAT<br>AACTCGAGTTATTGGTACTGAAC<br>TCCCGCTTTTT |  |

**Table S3 List of antibodies used in this study**

| <b>Target protein</b> | <b>Application</b> | <b>Antibody name</b>               | <b>Conditions used</b> |
|-----------------------|--------------------|------------------------------------|------------------------|
| DNMT1                 | ChIP               | D4692 (Sigma)                      | 5 ul                   |
| DNMT3B                | ChIP               | House-made                         | 0.5ul                  |
| HDAC1                 | ChIP               | ab7028 (Abcam)                     | 3 ul                   |
| CHD4                  | ChIP               | 4H4 (Sigma)                        | 5 ul                   |
| HDAC1                 | western/IP         | 5356 (Cell Signaling technologies) | 1/1000                 |
| HDAC2                 | western/IP         | 2540 (Cell Signaling Technologies) | 1/1000                 |
| CHD4                  | western/IP         | 4H4 (Sigma)                        | 1/1000                 |
| MTA1                  | western/IP         | M7693 (Sigma)                      | 1/1000                 |
| MTA2                  | western/IP         | M7569 (Sigma)                      | 1/1000                 |
| RBBP4                 | western/IP         | 2566 (Epitomics)                   | 1/1000                 |
| RBBP7                 | western/IP         | R4279 (Sigma)                      | 1/1000                 |
| $\alpha$ -tubulin     | western            | sc-5286 (Santa Cruz)               | 1/1000                 |
| GFP                   | western            | sc-8334 (Santa Cruz)               | 1/5000                 |
| $\beta$ -actin        | western            | A2547 (Sigma)                      | 1/5000                 |
| DNMT1                 | western/IP         | Abcam                              | 1/1000                 |
| DNMT1                 | Western/IP         | D4692 (Sigma)                      | 1/1000                 |
